# Supplementary material for: Separating neural and vascular effects of caffeine using simultaneous EEG–FMRI: Differential effects of caffeine on cognitive and sensorimotor brain responses
Source: PubMed Central journal article supplement (PMC3778750; doi:10.1016/j.neuroimage.2012.04.041), 2012-08-01

### Auditory oddball

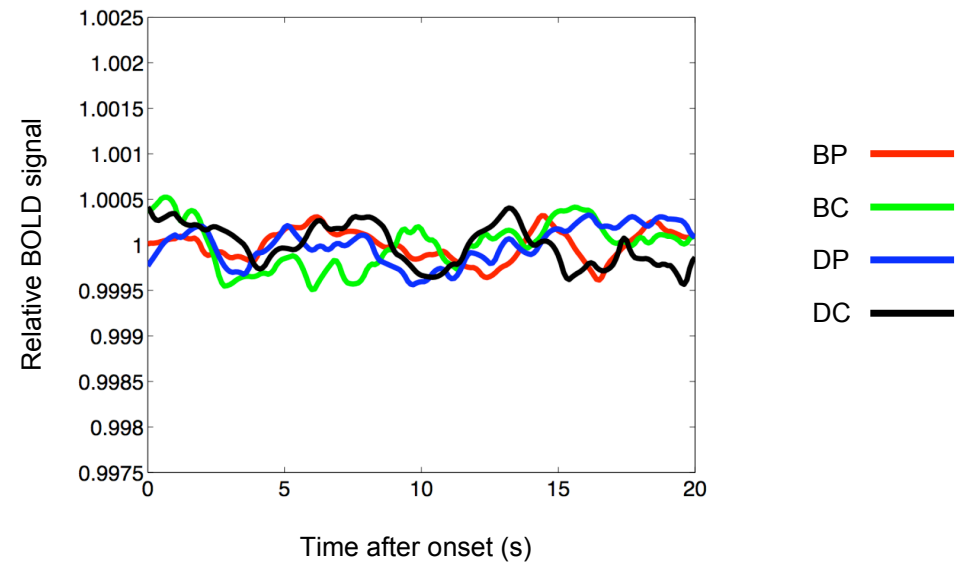

Supplement: mmc5.pdf [file mmc5.pdf]
